# Supplementary material for: Comparison of outcomes in patients with stage III versus limited stage IV non-small cell lung cancer
Source: Radiat Oncol. 2011 Jun 30;6:80. doi: 10.1186/1748-717X-6-80 (PMC3141527; doi:10.1186/1748-717X-6-80)
Supplement: Additional file 2 — Table S2 - overall survival from date of diagnosis. [file 1748-717X-6-80-S2.XLS]

## Sheet: Sheet1
TABLE 2: OVERALL SURVIVAL FROM DATE OF DIAGNOSIS
Stage Group	N	1 year	2 year	5 year
All Stage III	94	0.75	0.43	0.07
Stage III – did not metastasize	39	0.68	0.56	0.23
Stage III progressed to Stage IV	55	0.81	0.38	0
Initial limited stage IV	38	0.72	0.43	0.14
Stage I/II progressed to limited stage IV	14	0.91	0.7	0.27
